# Supplementary material
Source: PubMed Central journal article supplement (PMC4362716)
Supplement: NIHMS665317-supplement-Supplement1.pdf [file NIHMS665317-supplement-Supplement1.pdf]

## Supplementary Appendix

This appendix has been provided by the authors to give readers additional information about their work.

Supplement to: Garg AX, Nevis IF, McArthur E, et al. Gestational hypertension and preeclampsia in living kidney donors. *N Engl J Med* 2015;372:124-33. DOI: [10.1056/NEJMoa1408932](https://doi.org/10.1056/NEJMoa1408932)

## Index of Contents

## Page

|                                                                                                                                                                         |         |
|-------------------------------------------------------------------------------------------------------------------------------------------------------------------------|---------|
| Active Investigators in the DONOR Network and Study Acknowledgements .....                                                                                              | 2       |
| Table S1. STROBE checklist .....                                                                                                                                        | 3 - 4   |
| Table S2. Databases and coding definitions for exclusion criteria, baseline characteristics, and outcome measurements .....                                             | 5 - 7   |
| Table S3. Operating characteristics of hospital diagnosis codes used to define gestational hypertension and preeclampsia .....                                          | 8 - 9   |
| Table S4. Secondary study outcomes and their definitions .....                                                                                                          | 10      |
| Table S5. Outcomes in pregnancies with and without a hospital diagnosis for gestational hypertension or preeclampsia examined separately in donors and non-donors ..... | 11      |
| Table S6. Non-donor restrictions, characteristics and outcomes for kidney donors matched to the general population, followed by an interpretation of the results .....  | 12 - 14 |
| Table S7. Table 4 in the manuscript with detailed footnotes .....                                                                                                       | 15 - 17 |

Active Investigators in the Donor Nephrectomy Outcomes Research (DONOR) Network: Jennifer Arnold, Neil Boudville, Ann Bugeja, Christine Dipchand, Mona Doshi, Liane Feldman, Amit Garg, Eric Gibney, John Gill, Martin Karpinski, Joseph Kim, Scott Klarenbach, Greg Knoll, Ngan Lam, Charmaine Lok, Mauricio Monroy-Cuadros, Christopher Y. Nguan, G. V. Ramesh Prasad, Jessica Sontrop, Leroy Storsley, Darin Treleaven, Ann Young

Acknowledgements: We thank Dr. Meaghan Vlasschaert for her assistance with the data plan, Dr. Ann Young for her assistance compiling the data, and Dr. Ping Li and Ms. Anjie Huang for their advice on the data sources and statistical analysis plan. We thank Dr. Hassan Ibrahim, and Drs. Anna Varberg Reisæter and Jo Røislien for clarifying details about their important Minnesota and Norwegian experiences, respectively, which were the impetus for this analysis of Ontario, Canada data.

**Table S1. STROBE checklist**

| <b>STROBE checklist</b>      |                |                                                                                                                                                                                                      |                               |
|------------------------------|----------------|------------------------------------------------------------------------------------------------------------------------------------------------------------------------------------------------------|-------------------------------|
|                              | <b>Item No</b> | <b>Recommendation</b>                                                                                                                                                                                | <b>Where reported</b>         |
| <b>Title and abstract</b>    | 1              | (a) Indicate the study’s design with a commonly used term in the title or the abstract                                                                                                               | Abstract                      |
|                              |                | (b) Provide in the abstract an informative and balanced summary of what was done and what was found                                                                                                  | Abstract                      |
| <b>Introduction</b>          |                |                                                                                                                                                                                                      |                               |
| Background/rationale         | 2              | Explain the scientific background and rationale for the investigation being reported                                                                                                                 | Introduction                  |
| Objectives                   | 3              | State specific objectives, including any prespecified hypotheses                                                                                                                                     | Introduction                  |
| <b>Methods</b>               |                |                                                                                                                                                                                                      |                               |
| Study design                 | 4              | Present key elements of study design early in the paper                                                                                                                                              | Methods                       |
| Setting                      | 5              | Describe the setting, locations, and relevant dates, including periods of recruitment, exposure, follow-up, and data collection                                                                      | Methods                       |
| Participants                 | 6              | (a) Give the eligibility criteria, and the sources and methods of selection of participants. Describe methods of follow-up                                                                           | Methods                       |
|                              |                | (b) For matched studies, give matching criteria and number of exposed and unexposed                                                                                                                  | Methods                       |
| Variables                    | 7              | Clearly define all outcomes, exposures, predictors, potential confounders, and effect modifiers. Give diagnostic criteria, if applicable                                                             | Methods<br>Appendix           |
| Data sources/<br>measurement | 8              | For each variable of interest, give sources of data and details of methods of assessment (measurement). Describe comparability of assessment methods if there is more than one group                 | Methods<br>Appendix           |
| Bias                         | 9              | Describe any efforts to address potential sources of bias                                                                                                                                            | Methods                       |
| Study size                   | 10             | Explain how the study size was arrived at                                                                                                                                                            | Methods                       |
| Quantitative variables       | 11             | Explain how quantitative variables were handled in the analyses. If applicable, describe which groupings were chosen and why                                                                         | Methods                       |
| Statistical methods          | 12             | (a) Describe all statistical methods, including those used to control for confounding                                                                                                                | Methods                       |
|                              |                | (b) Describe any methods used to examine subgroups and interactions                                                                                                                                  | Methods                       |
|                              |                | (c) Explain how missing data were addressed                                                                                                                                                          | Methods                       |
|                              |                | (d) If applicable, explain how loss to follow-up was addressed                                                                                                                                       | Not applicable                |
|                              |                | (e) Describe any sensitivity analyses                                                                                                                                                                | Methods                       |
| <b>Results</b>               |                |                                                                                                                                                                                                      |                               |
| Participants                 | 13             | (a) Report numbers of individuals at each stage of study— e.g. numbers potentially eligible, examined for eligibility, confirmed eligible, included in the study, completing follow-up, and analysed | Results                       |
|                              |                | (b) Give reasons for non-participation at each stage                                                                                                                                                 | Results                       |
|                              |                | (c) Consider use of a flow diagram                                                                                                                                                                   | Not applicable                |
| Descriptive data             | 14             | (a) Give characteristics of study participants (e.g. demographic, clinical, social) and information on exposures and potential confounders                                                           | Results<br>Table 1<br>Table 2 |
|                              |                | (b) Indicate number of participants with missing data for each variable of interest                                                                                                                  | Methods                       |

|                          |    |                                                                                                                                                                                                               |                                |
|--------------------------|----|---------------------------------------------------------------------------------------------------------------------------------------------------------------------------------------------------------------|--------------------------------|
|                          |    | (c) Summarise follow-up time (e.g. average and total amount)                                                                                                                                                  | Results                        |
| Outcome data             | 15 | Report numbers of outcome events or summary measures over time                                                                                                                                                | Results<br>Table 3<br>Appendix |
| Main results             | 16 | (a) Give unadjusted estimates and, if applicable, confounder-adjusted estimates and their precision (e.g. 95% confidence interval). Make clear which confounders were adjusted for and why they were included | Results<br>Table 3             |
|                          |    | (b) Report category boundaries when continuous variables were categorized                                                                                                                                     | Table 1<br>Table 2<br>Table 3  |
|                          |    | (c) If relevant, consider translating estimates of relative risk into absolute risk for a meaningful time period                                                                                              | Results                        |
| Other analyses           | 17 | Report other analyses done—e.g. analyses of subgroups and interactions, and sensitivity analyses                                                                                                              | Results<br>Figure 1            |
| <b>Discussion</b>        |    |                                                                                                                                                                                                               |                                |
| Key results              | 18 | Summarise key results with reference to study objectives                                                                                                                                                      | Discussion                     |
| Limitations              | 19 | Discuss limitations of the study, taking into account sources of potential bias or imprecision. Discuss both direction and magnitude of any potential bias                                                    | Discussion                     |
| Interpretation           | 20 | Give a cautious overall interpretation of results considering objectives, limitations, multiplicity of analyses, results from similar studies, and other relevant evidence                                    | Discussion<br>Table 4          |
| Generalisability         | 21 | Discuss the generalisability (external validity) of the study results                                                                                                                                         | Discussion                     |
| <b>Other information</b> |    |                                                                                                                                                                                                               |                                |
| Funding                  | 22 | Give the source of funding and the role of the funders for the present study and, if applicable, for the original study on which the present article is based                                                 | Disclosure                     |

**Table S2. Databases and coding definitions for restriction criteria, baseline characteristics, and outcome measurements.**

| Characteristic/Condition                                                                                                                     | Database         | Codes                                                                                                                                                                                                                                                                                                                                                                                                                                                                                                                                                                                                                                                                                                                                                                                                                                                                                                                                                                                                                                                                                                                                                                                                                                                                                                                                                                                                                                                                                                                                                                   |
|----------------------------------------------------------------------------------------------------------------------------------------------|------------------|-------------------------------------------------------------------------------------------------------------------------------------------------------------------------------------------------------------------------------------------------------------------------------------------------------------------------------------------------------------------------------------------------------------------------------------------------------------------------------------------------------------------------------------------------------------------------------------------------------------------------------------------------------------------------------------------------------------------------------------------------------------------------------------------------------------------------------------------------------------------------------------------------------------------------------------------------------------------------------------------------------------------------------------------------------------------------------------------------------------------------------------------------------------------------------------------------------------------------------------------------------------------------------------------------------------------------------------------------------------------------------------------------------------------------------------------------------------------------------------------------------------------------------------------------------------------------|
| <b>Exclusion Criteria for Donors</b>                                                                                                         |                  |                                                                                                                                                                                                                                                                                                                                                                                                                                                                                                                                                                                                                                                                                                                                                                                                                                                                                                                                                                                                                                                                                                                                                                                                                                                                                                                                                                                                                                                                                                                                                                         |
| Hypertensive Disorders of Pregnancy                                                                                                          | CIHI-DAD<br>OHIP | <b>ICD-9:</b> 6420, 6523, 6427, 6429, 6424, 6425, 6426<br><b>ICD-10:</b> O11, O13, O14, O15, O16<br><b>OHIP:</b> 642                                                                                                                                                                                                                                                                                                                                                                                                                                                                                                                                                                                                                                                                                                                                                                                                                                                                                                                                                                                                                                                                                                                                                                                                                                                                                                                                                                                                                                                    |
| <b>Restrictions Applied to Healthy Non-Donors</b> (excluded as eligible non-donors if there was evidence of any of the following conditions) |                  |                                                                                                                                                                                                                                                                                                                                                                                                                                                                                                                                                                                                                                                                                                                                                                                                                                                                                                                                                                                                                                                                                                                                                                                                                                                                                                                                                                                                                                                                                                                                                                         |
| Hypertensive Disorders of Pregnancy                                                                                                          | CIHI-DAD<br>OHIP | As above                                                                                                                                                                                                                                                                                                                                                                                                                                                                                                                                                                                                                                                                                                                                                                                                                                                                                                                                                                                                                                                                                                                                                                                                                                                                                                                                                                                                                                                                                                                                                                |
| Diabetes                                                                                                                                     | ODD <sup>a</sup> | <b>ICD-9:</b> 250<br><b>ICD-10:</b> E10, E11, E13, E14<br><b>OHIP:</b> 250, Q040, K029, K030, K045, K046                                                                                                                                                                                                                                                                                                                                                                                                                                                                                                                                                                                                                                                                                                                                                                                                                                                                                                                                                                                                                                                                                                                                                                                                                                                                                                                                                                                                                                                                |
| Hypertension                                                                                                                                 | CIHI-DAD<br>OHIP | <b>ICD-9:</b> 401, 402, 403, 404, 405<br><b>ICD-10:</b> I10, I11, I12, I13, I15<br><b>OHIP:</b> 401, 402, 403                                                                                                                                                                                                                                                                                                                                                                                                                                                                                                                                                                                                                                                                                                                                                                                                                                                                                                                                                                                                                                                                                                                                                                                                                                                                                                                                                                                                                                                           |
| Cardiovascular Disease                                                                                                                       | CIHI-DAD         | <b>ICD-9:</b> 39, 40, 41, 42, 43, 44, 45<br><b>ICD-10:</b> I                                                                                                                                                                                                                                                                                                                                                                                                                                                                                                                                                                                                                                                                                                                                                                                                                                                                                                                                                                                                                                                                                                                                                                                                                                                                                                                                                                                                                                                                                                            |
| Cardiovascular Procedure                                                                                                                     | CIHI-DAD<br>OHIP | <b>CCI:</b> 1IJ50, 1IJ76, 1KA76, 1KG76<br><b>CCP:</b> 4802, 4803, 4909, 481, 5024, 5034, 5125<br><b>OHIP:</b> N220, R742, R743, R780, R783, R785, R787, R792, R797, R802, R804, R814, R816, R817, Z434                                                                                                                                                                                                                                                                                                                                                                                                                                                                                                                                                                                                                                                                                                                                                                                                                                                                                                                                                                                                                                                                                                                                                                                                                                                                                                                                                                  |
| Cancer                                                                                                                                       | CIHI-DAD<br>OHIP | <b>ICD-9:</b> V10, 140, 141, 142, 143, 144, 145, 146, 147, 148, 149, 150, 151, 152, 153, 154, 155, 156, 157, 158, 159, 160, 161, 162, 163, 164, 165, 170, 171, 172, 173, 174, 175, 176, 179, 180, 181, 182, 183, 184, 185, 186, 187, 188, 189, 190, 191, 192, 193, 194, 1950, 1951, 1952, 1953, 1954, 1955, 1958, 196, 197, 198, 1990, 1991, 2000, 2001, 2002, 2008, 2010, 2011, 2012, 2014, 2015, 2016, 2017, 2019, 2020, 2026, 2028, 2029, 203, 204, 205, 206, 207, 208, 230, 231, 232, 233, 234<br><b>ICD-10:</b> 80003, 80006, 80013, 80023, 80033, 80043, 80102, 80103, 80106, 80113, 80123, 80203, 80213, 83123, 87202, 87203, 959, 965, 966, 967, 968, 969, 970, 971, 980, 982, 984, 985, 986, 987, 988, 989, 990, 991, 993, C00, C01, C02, C03, C04, C05, C06, C07, C08, C09, C10, C11, C12, C13, C14, C15, C16, C17, C18, C19, C20, C21, C22, C23, C24, C25, C26, C30, C31, C32, C33, C34, C37, C38, C39, C40, C41, C43, C44, C45, C46, C47, C48, C49, C50, C51, C52, C53, C54, C55, C56, C57, C58, C60, C61, C62, C63, C64, C65, C66, C67, C68, C69, C70, C71, C72, C73, C74, C75, C76, C77, C78, C79, C80, C81, C82, C83, C84, C85, C90, C91, C92, C93, C94, C95, C96, C97, D00, D01, D02, D03, D04, D05, D06, D07, D09<br><b>OHIP:</b> 140, 141, 142, 143, 144, 145, 146, 147, 148, 149, 150, 151, 152, 153, 154, 155, 156, 157, 158, 159, 160, 161, 162, 163, 164, 165, 170, 171, 172, 173, 174, 175, 179, 180, 181, 182, 183, 184, 185, 186, 187, 188, 189, 190, 191, 192, 193, 194, 195, 196, 197, 198, 199, 200, 201, 202, 203, 204, 205, 206, 207, 208 |
| Pulmonary Disease                                                                                                                            | CIHI-DAD         | <b>ICD-9:</b> 46, 47, 48, 49, 50, 51<br><b>ICD-10:</b> J                                                                                                                                                                                                                                                                                                                                                                                                                                                                                                                                                                                                                                                                                                                                                                                                                                                                                                                                                                                                                                                                                                                                                                                                                                                                                                                                                                                                                                                                                                                |
| Liver Disease                                                                                                                                | CIHI-DAD         | <b>ICD-9:</b> 57                                                                                                                                                                                                                                                                                                                                                                                                                                                                                                                                                                                                                                                                                                                                                                                                                                                                                                                                                                                                                                                                                                                                                                                                                                                                                                                                                                                                                                                                                                                                                        |

|                                        |                  |                                                                                                                                                                                                                                                                                                                                                                                                                                                                                 |
|----------------------------------------|------------------|---------------------------------------------------------------------------------------------------------------------------------------------------------------------------------------------------------------------------------------------------------------------------------------------------------------------------------------------------------------------------------------------------------------------------------------------------------------------------------|
|                                        |                  | <b>ICD-10: K7</b>                                                                                                                                                                                                                                                                                                                                                                                                                                                               |
| Genitourinary Disease                  | CIHI-DAD         | <b>ICD-9: 58, 59, 60, 61, 62</b><br><b>ICD-10: N</b>                                                                                                                                                                                                                                                                                                                                                                                                                            |
| Systemic Lupus Erythematosus           | CIHI-DAD         | <b>ICD-9: 7100</b><br><b>ICD-10: M32</b>                                                                                                                                                                                                                                                                                                                                                                                                                                        |
| Rheumatoid Arthritis                   | CIHI-DAD         | <b>ICD-9: 714</b><br><b>ICD-10: M05, M06</b>                                                                                                                                                                                                                                                                                                                                                                                                                                    |
| Human Immunodeficiency Virus Infection | CIHI-DAD<br>OHIP | <b>ICD-9: 042, 043, 044, V08, 176</b><br><b>ICD-10: B24, C46, Z21</b><br><b>OHIP: 042, 043, 044</b>                                                                                                                                                                                                                                                                                                                                                                             |
| Nephrectomy/Kidney Transplantation     | CIHI-DAD<br>OHIP | <b>ICD-9: V420, 99681</b><br><b>ICD-10: T861, N165, Z940</b><br><b>CCP: 6743, 675</b><br><b>CCI: 1PC85</b><br><b>OHIP: E762, S435, E769, S434, E771, Z631, G347, G348, G412, G408, G409</b>                                                                                                                                                                                                                                                                                     |
| Renal Biopsy                           | CIHI-DAD<br>OHIP | <b>CCP: 6781, 6782</b><br><b>CCI: 1PC87</b><br><b>OHIP: Z601</b>                                                                                                                                                                                                                                                                                                                                                                                                                |
| Dialysis                               | CIHI-DAD<br>OHIP | <b>ICD-9: V451, V560, V568, 36104</b><br><b>ICD-10: T824, Y602, Y612, Y622, Y841, Z49, Z992, N180, E1022, E1023, E1122, E1123, E1322, E1323, E1422, E1423</b><br><b>CCP: 5127, 5195, 6698</b><br><b>CCI: 7SC59QD, 1KY76, 1PZ21</b><br><b>OHIP: R849, G323, G336, G325, G326, G860, G862, G863, G865, G866, R825, R826, R827, R833, R840, R851, G330, G331, G332, G861, G864, R852, G082, G083, G085, G090, G091, G092, G093, G094, G095, G096, G294, G295, G333, H540, H740</b> |
| Nephrology Consultation <sup>b</sup>   | OHIP             | <b>OHIP: C132, C101, C138, G860, G323, E083, C137, C135, A135</b>                                                                                                                                                                                                                                                                                                                                                                                                               |
| Family Physician Visit                 | IPDB             | N/A                                                                                                                                                                                                                                                                                                                                                                                                                                                                             |
| <b>Baseline Characteristics</b>        |                  |                                                                                                                                                                                                                                                                                                                                                                                                                                                                                 |
| Sex                                    | RPDB             | N/A                                                                                                                                                                                                                                                                                                                                                                                                                                                                             |
| Age                                    | RPDB             | N/A                                                                                                                                                                                                                                                                                                                                                                                                                                                                             |
| Year of Cohort Entry                   | TGLN             | N/A                                                                                                                                                                                                                                                                                                                                                                                                                                                                             |
| Rural Residence                        | RPDB             | N/A                                                                                                                                                                                                                                                                                                                                                                                                                                                                             |
| Income Quintile                        | RPDB             | N/A                                                                                                                                                                                                                                                                                                                                                                                                                                                                             |
| Pregnancy                              | MOMBABY          | [B_BDATE] infant/maternal CIHI-DAD record                                                                                                                                                                                                                                                                                                                                                                                                                                       |
| Family Physician Visit                 | IPDB             | N/A                                                                                                                                                                                                                                                                                                                                                                                                                                                                             |
| Prenatal Physician Visit               | CIHI-DAD<br>OHIP | <b>ICD-9: V220, V221, V230, V231, V232, V233, V234, V235, V238, V239, V288, V289</b><br><b>ICD-10: Z34, Z35</b><br><b>CCP: 0288</b><br><b>CCI: 5AB01, 5AB03</b><br><b>OHIP: 970, P003, P004, P005</b>                                                                                                                                                                                                                                                                           |
| Pregnancy Ultrasound                   | OHIP             | <b>OHIP: J128, J135, J138, J157, J158, J159, J160, J162, J428, J435, J438, J457, J458, J459, J460, J462</b>                                                                                                                                                                                                                                                                                                                                                                     |
| <b>Outcomes</b>                        |                  |                                                                                                                                                                                                                                                                                                                                                                                                                                                                                 |
| Gestational Hypertension               | CIHI-DAD         | <b>See Table S3 in the Supplement</b>                                                                                                                                                                                                                                                                                                                                                                                                                                           |
| Preeclampsia (includes eclampsia)      | CIHI-DAD<br>OHIP | <b>See Table S3 in the Supplement</b>                                                                                                                                                                                                                                                                                                                                                                                                                                           |
| Caesarean Section                      | CIHI-DAD<br>OHIP | <b>ICD-9: 6697</b><br><b>ICD-10: O82</b>                                                                                                                                                                                                                                                                                                                                                                                                                                        |

|                        |          |                                                                                           |
|------------------------|----------|-------------------------------------------------------------------------------------------|
|                        |          | <b>CCP:</b> 860, 861, 862, 868, 869<br><b>CCI:</b> 5MD60<br><b>OHIP:</b> P018, P041, P042 |
| Post-partum hemorrhage | CIHI-DAD | <b>ICD-9:</b> 666<br><b>ICD-10:</b> O72                                                   |
| Preterm Birth          | MOMBABY  | [B_GESTWKS_DEL] or [M_GESTWKS_DEL] < 37 weeks in infant/maternal CIHI-DAD record          |
| Low Birth Weight       | MOMBABY  | [WEIGHT] < 2500g in infant CIHI-DAD record                                                |
| Maternal Death         | RPDB     | N/A                                                                                       |
| Stillbirth             | MOMBABY  | [B_STILLBIRTH] or [M_STILLBIRTH] in infant/maternal CIHI-DAD record                       |
| Neonatal Death         | MOMBABY  | [DTHDATE] within 28 days of birth in infant RPDB record                                   |

Abbreviations: CCI, Canadian Classification of Health Interventions; CCP, Canadian Classification of Diagnostic, Therapeutic and Surgical Procedures; CIHI-DAD, Canadian Institute for Health Information Discharge Abstract Database; ICD-9 International Classification of Disease, Ninth Revision; ICD-10, International Classification of Disease, Tenth Revision; ICES, Institute for Clinical Evaluative Sciences; IPDB, ICES Physician Database; ODB, Ontario Drug Benefit; ODD, Ontario Diabetes Database; OHIP, Ontario Health Insurance Plan; RPDB, Registered Persons Database; TGLN, Trillium Gift of Life Network; N/A, Not applicable

<sup>a</sup>The Ontario Diabetes Database is an ICES-derived database that contains all Ontario diabetes patients defined by the presence of any of the specified codes.

<sup>b</sup>Nephrology consultation was defined by the presence of any nephrology consultation code billed by a nephrologist, who was defined as a physician who, during the study period, billed at least 25 nephrology consultation codes (on separate days) and at least 50 dialysis codes (on separate days).



**Table S3. Operating characteristics of hospital diagnosis codes used to define gestational hypertension and preeclampsia**

| Outcome                                                        | Dates                 | Codes used in study                      | Codes used in validation | Reference Standard                                                                                                                                                    | Operating Characteristics (%) |      |      | Reference              |
|----------------------------------------------------------------|-----------------------|------------------------------------------|--------------------------|-----------------------------------------------------------------------------------------------------------------------------------------------------------------------|-------------------------------|------|------|------------------------|
|                                                                |                       |                                          |                          |                                                                                                                                                                       | Sn                            | Sp   | PPV  |                        |
| Gestational hypertension                                       | 1992 to 2002 (ICD-9)  | 6420, 6423, 6429                         | ...                      | ...                                                                                                                                                                   | ...                           | ...  | ...  | ...                    |
|                                                                | 2002 to 2013 (ICD-10) | 013, 016                                 | 013                      | Identification of 'hypertension in pregnancy (onset >20 weeks gestation)' on chart review by experienced clinicians                                                   | 68.2                          | 99.6 | 99.4 | Hadfield et al, 2008   |
|                                                                |                       |                                          | 013                      | Identification of 'gestational hypertension' on chart review using a well-described and accepted definition                                                           | 10.0                          | 99.8 | 56.3 | Klemmensen et al, 2007 |
| Preeclampsia (including eclampsia)                             | 1992 to 2002 (ICD-9)  | 6424, 6425, 6426, 6427                   | 6424                     | Identification of 'mild or unspecified preeclampsia' on chart review by obstetricians using criteria established by the American College of Obstetrics and Gynecology | 78.4                          | 64.3 | 45.3 | Geller et al, 2004     |
|                                                                |                       |                                          | 6425                     | Identification of 'severe preeclampsia' on chart review by obstetricians using criteria established by the American College of Obstetrics and Gynecology              | 66.7                          | 85.0 | 84.8 | Geller et al, 2004     |
|                                                                |                       |                                          | 6426                     | Identification of 'eclampsia' on chart review by obstetricians using criteria established by the American College of Obstetrics and Gynecology                        | 83.3                          | 94.6 | 41.7 | Geller et al, 2004     |
|                                                                |                       |                                          | 6425, 6426               | Identification of 'severe preeclampsia and eclampsia' on chart review by obstetrician                                                                                 | 100                           | 100  | 100  | Korst et al, 2004      |
|                                                                |                       |                                          | 6425, 6427               | Identification of 'preeclampsia' on chart review by experienced accredited record technicians or certified coding specialists                                         | 76.0                          | ...  | 94.0 | Yasmeen et al, 2006    |
|                                                                | 2002 to 2013 (ICD-10) | 011, 014, 015                            | 014, 015                 | Identification of 'preeclampsia' on chart review using a well-described and accepted definition                                                                       | 69.3                          | 99.3 | 74.4 | Klemmensen et al, 2007 |
|                                                                | 1992 to 2013 (OHIP)   | 642                                      | ...                      | ...                                                                                                                                                                   | ...                           | ...  | ...  | ...                    |
| Gestational hypertension or preeclampsia (including eclampsia) | 1992 to 2002 (ICD-9)  | 6420, 6423, 6424, 6425, 6426, 6427, 6429 | 6423, 6424, 6425, 6427   | Identification of 'gestational hypertension or preeclampsia' on chart review by experienced accredited record technicians or certified coding specialists             | 88.0                          | ...  | 91.0 | Yasmeen et al, 2006    |
|                                                                | 2002 to 2013 (ICD-10) | 011, 013, 014, 015, 016                  | 013, 014, 015            | Identification of 'hypertensive disorders of pregnancy' on chart review using a well-described and accepted definition                                                | 48.9                          | 99.6 | 88.8 | Klemmensen et al, 2007 |
|                                                                | 1992 to 2013 (OHIP)   | 642                                      | ...                      | ...                                                                                                                                                                   | ...                           | ...  | ...  | ...                    |

Abbreviations: Sn, Sensitivity (indicates the percentage of women with the condition who are correctly identified as having the condition); Sp, Specificity (indicates the percentage of healthy women who are correctly identified as not having the condition); PPV, Positive predictive value (indicates the percentage of women whose diagnosis is recorded correctly). Ellipses (...) indicate data not reported. ICD-9 International Classification of Disease, Ninth Revision; ICD-10, International Classification of Disease, Tenth Revision. OHIP, Ontario Health Insurance Plan

All ICD-9 and ICD-10 codes were hospital based diagnosis codes recorded in the Canadian Institute for Health Information Discharge Abstract Database (CIHI-DAD). In this study all the observed OHIP diagnostic fee codes for preeclampsia (OHIP Dx 642 – Complications of pregnancy, childbirth and the puerperium – preeclampsia, eclampsia or toxemia) were claims with a date either during a hospital stay, or in very close proximity to the hospital stay.

Interpretation of Hospital Database Diagnosis Codes of Gestational Hypertension and Preeclampsia

- The operating characteristics for the hospital diagnosis ICD-9 and ICD-10 codes used to define the outcomes of gestational hypertension and preeclampsia are shown in the table above. This coding algorithm was prespecified in

the study protocol. In summary, most coding algorithms used to identify gestational hypertension or preeclampsia within a hospital admission have moderate to high specificity (64.3 in one study, 85-100.0% in all others) and a moderate to high positive predictive value (41.7-100.0%). While sensitivity is variable (10.0-100.0%), it appears to improve for coding algorithms used to identify more severe disease (66.7-100.0% for preeclampsia vs. 10.0-68.2% for gestational hypertension).

- These coding algorithms were validated against a gold standard from chart review, which in many cases, was performed by a clinician using a well-described and accepted definition of the condition. Therefore, we expect these codes to accurately reflect clinician diagnosis of gestational hypertension and preeclampsia (albeit subjective) despite not having access to laboratory data or clinical parameters at the time of this study.
- Whether the operating characteristics for these coding algorithms vary by donor status is unknown. However, our study population had universal healthcare benefits, where all healthcare encounters were recorded, and the pregnancies of donors and non-donors had a similar high level of health surveillance [in the current study both the donors and non-donors had the same number of healthcare visits during pregnancy: 10 prenatal visits and 3 pregnancy ultrasounds; also all the pregnancies in donors and non-donors were delivered in hospital]. It is our understanding that physicians in our province demonstrate a low threshold for admitting women to hospital for the management of complicated hypertension in pregnancy regardless of donor status, and that preeclampsia is almost exclusively managed as an inpatient. We would expect similar access to laboratory data and clinical parameters to confirm diagnoses of gestational hypertension and preeclampsia, should these conditions be present, among both donors and non-donors.
- Of note, neither the medical coders nor the physician / healthcare teams caring for the donors and non-donors were aware of the hypothesis of the current study, or even that a study was being undertaken. So we are not concerned that study awareness influenced the ascertainment of outcomes. Furthermore, a prominent 2004 Amsterdam international consensus conference on living kidney donation (a guideline that was available for a large portion of pregnancies during the study period) concluded that there was insufficient evidence to be concerned that living donation increases the risk of gestational hypertension or preeclampsia. We also undertook an analysis and confirm that the incidence of gestational hypertension and preeclampsia diagnoses in living donors was no higher after 2009 when two studies, one from the United States and the other from Norway, suggested that kidney donation could increase the risk of gestational hypertension and preeclampsia.
- As a limitation, the operating characteristics reported in the table above only apply to the coding algorithm specified and do not necessarily reflect the entire collection of codes used to define the primary outcomes in our study. Therefore, these statistics should be used as a reference source from which the actual operating characteristics of coding algorithms used in this study can be approximated. Our rationale for including some codes not previously validated was to improve sensitivity to capture the outcomes. In cases where individual and combinations of codes have been validated this strategy has resulted in modest gains in sensitivity with essentially no change to specificity.

## References

- Geller SE, Ahmed S, Brown ML, Cox SM, Rosenberg D, Kilpatrick SJ. International Classification of Diseases-9th revision coding for preeclampsia: how accurate is it? *Am J Obstet Gynecol* 2004;190(6):1629-33; discussion 1633-4.
- Hadfield RM, Lain SJ, Cameron CA, Bell JC, Morris JM, Roberts CL. The prevalence of maternal medical conditions during pregnancy and a validation of their reporting in hospital discharge data. *Aust N Z J Obstet Gynaecol* 2008;48(1):78-82.
- Klemmensen AK, Olsen SF, Osterdal ML, Tabor A. Validity of preeclampsia-related diagnoses recorded in a national hospital registry and in a postpartum interview of the women. *Am J Epidemiol* 2007;166(2):117-24.
- Korst LM, Gregory KD, Gornbein JA. Elective primary caesarean delivery: accuracy of administrative data. *Paediatr Perinat Epidemiol* 2004;18(2):112-9.
- Yasmeen S, Romano PS, Schembri ME, Keyzer JM, Gilbert WM. Accuracy of obstetric diagnoses and procedures in hospital discharge data. *Am J Obstet Gynecol* 2006;194(4):992-1001.

#### **Table S4 Secondary study outcomes and their definitions**

- Each component of the primary outcome (gestational hypertension or preeclampsia) examined separately. When diagnostic codes for both gestational hypertension and preeclampsia were present in a given pregnancy, we categorized the event as preeclampsia.
- Caesarean section, defined with healthcare database procedural codes (Table S2)
- Post-partum hemorrhage, defined with healthcare database codes (Table S2)
- Pre-term birth (<37 weeks gestation)
- Low birth weight (<2500 g)
- Maternal death (death during pregnancy or within 42 days of childbirth)
- Stillbirth (delivery with no signs of life)
- Neonatal death (death within 28 days of birth)

**Table S5. Outcomes in pregnancies with and without a hospital diagnosis for gestational hypertension or preeclampsia examined separately in donors and non-donors.**

|                                | Donor Pregnancies<br>(n = 131)              |                 | Non-donor pregnancies<br>(n = 788)          |                 |
|--------------------------------|---------------------------------------------|-----------------|---------------------------------------------|-----------------|
|                                | Gestational hypertension or<br>preeclampsia |                 | Gestational hypertension or<br>preeclampsia |                 |
|                                | Yes<br>(n = 15)                             | No<br>(n = 116) | Yes<br>(n = 38)                             | No<br>(n = 750) |
| Caesarean section              | 7 (46.7%)                                   | 34 (29.3%)      | 16 (42.1%)                                  | 208 (27.7%)     |
| Low birth weight<br>(< 2500 g) | (...)                                       | (...)           | 7 (18.4%)                                   | 22 (2.9%)       |

Presented is the number of events (%).

(...) the cell count was  $\leq 5$  and results are not reported in order to comply with privacy regulations. The proportion of women with a low birth weight was higher when gestational hypertension or preeclampsia was present, compared to when it was absent (8-fold higher, similar to the 6-fold higher proportion observed in non-donor pregnancies).

**Table S6. Non-donor restrictions, characteristics and outcomes for kidney donors matched to the general population (3 tables), followed by an interpretation of the results**

Non-donor restrictions: As reported in the manuscript, we had an original sample of 731,823 general population women. In the primary analysis this sample was restricted to eligible non-donors (52% of the original sample) who had an absence of health conditions prior to their cohort entry date. Eligible non-donors were then matched to donors. In the current analysis we simply restricted the general population to women without evidence of hypertension in pregnancy prior to their cohort entry date (an exclusion applied to donors), and women who saw a physician at least once in the two years prior to their cohort entry date (to ensure non-donors had the same opportunity to access physicians for healthcare). Applying these restrictions left 597,726 women (82% of the original sample) eligible to be selected as non-donors.

Matching procedures: As in the primary analysis, we matched six eligible non-donors to each donor on baseline characteristics that can be associated with gestational hypertension and preeclampsia risk: age at cohort entry (exact age in years), cohort entry date (within two years), urban or rural residence (population less than 10,000), income (categorized into fifths of average neighborhood income), number of pregnancies carried to at least 20 weeks gestation prior to cohort entry (0, 1 or  $\geq 2$ ), and the time to first birth after cohort entry (live or stillbirth; matched within two years). Each non-donor could only be selected once.

| <b>Characteristics of kidney donors and matched general population non-donors at cohort entry. <sup>a</sup></b>                                                                                                                                                                                                                                                 |                           |                                                          |                             |
|-----------------------------------------------------------------------------------------------------------------------------------------------------------------------------------------------------------------------------------------------------------------------------------------------------------------------------------------------------------------|---------------------------|----------------------------------------------------------|-----------------------------|
|                                                                                                                                                                                                                                                                                                                                                                 | <b>Donors</b>             | <b>Matched<br/>General<br/>Population<br/>Non-donors</b> | <b>P value <sup>b</sup></b> |
| Women, number                                                                                                                                                                                                                                                                                                                                                   | 85                        | 510                                                      |                             |
| Age, years                                                                                                                                                                                                                                                                                                                                                      | 29 [26 to 32]             | 29 [26 to 32]                                            | 1.00                        |
| <u>Year of cohort entry</u>                                                                                                                                                                                                                                                                                                                                     |                           |                                                          | 0.12                        |
| 1992 – 1995                                                                                                                                                                                                                                                                                                                                                     | 16 (18.8%)                | 87 (17.1%)                                               |                             |
| 1996 – 1999                                                                                                                                                                                                                                                                                                                                                     | 19 (22.4%)                | 101 (19.8%)                                              |                             |
| 2000 – 2004                                                                                                                                                                                                                                                                                                                                                     | 22 (25.9%)                | 151 (29.6%)                                              |                             |
| 2005 – 2009                                                                                                                                                                                                                                                                                                                                                     | 28 (32.9%)                | 171 (33.5%)                                              |                             |
| Rural residence                                                                                                                                                                                                                                                                                                                                                 | $\leq 5$ ( $\leq 5.9\%$ ) | 30 (5.9%)                                                | 1.00                        |
| <u>Income quintile <sup>c</sup></u>                                                                                                                                                                                                                                                                                                                             |                           |                                                          | 1.00                        |
| 1 <sup>st</sup> quintile (lowest)                                                                                                                                                                                                                                                                                                                               | 12 (14.1%)                | 72 (14.1%)                                               |                             |
| 2 <sup>nd</sup> quintile                                                                                                                                                                                                                                                                                                                                        | 15 (17.6%)                | 90 (17.6%)                                               |                             |
| 3 <sup>rd</sup> quintile (middle)                                                                                                                                                                                                                                                                                                                               | 13 (15.3%)                | 78 (15.3%)                                               |                             |
| 4 <sup>th</sup> quintile                                                                                                                                                                                                                                                                                                                                        | 24 (28.2%)                | 144 (28.2%)                                              |                             |
| 5 <sup>th</sup> quintile (highest)                                                                                                                                                                                                                                                                                                                              | 16 (18.8%)                | 96 (18.8%)                                               |                             |
| At least one pregnancy before cohort entry <sup>d</sup>                                                                                                                                                                                                                                                                                                         | 25 (29.4%)                | 150 (29.4%)                                              | 1.00                        |
| Time from last pregnancy, years <sup>e</sup>                                                                                                                                                                                                                                                                                                                    | 3 [1 to 5]                | 2 [1 to 6]                                               | 0.36                        |
| Physician visits in prior year, number                                                                                                                                                                                                                                                                                                                          | 4 [2 to 8]                | 4 [2 to 6]                                               | 0.30                        |
| Data presented as median [interquartile range] or as number (percent).                                                                                                                                                                                                                                                                                          |                           |                                                          |                             |
| <sup>a</sup> For living kidney donors the date of cohort entry was the date of nephrectomy, and for non-donors it was randomly assigned (simulated nephrectomy date) to establish the date follow-up began.                                                                                                                                                     |                           |                                                          |                             |
| <sup>b</sup> Derived from generalized estimating equations with default link function accounting for the correlation structure within matched sets. A normal distribution was specified when the variable was continuous, a Poisson distribution when the variable was count data, a multinomial distribution when the variable was categorical, and a binomial |                           |                                                          |                             |

distribution when the variable was binary.

<sup>c</sup> Income was categorized by fifths of average neighborhood income. This was only done for urban residents (96% of the cohort) as it was problematic to delineate neighborhood boundaries in rural areas.

<sup>d</sup> Ontario healthcare database records were available since July 1991. In this study, baseline records were available from the age of 25 years onwards for 89% of women, and from the age of 20 onwards for 61% of women.

<sup>e</sup> Analysis restricted to those with at least one prior pregnancy.

### Characteristics at the time of follow-up pregnancies in kidney donors and matched general population non-donors.

|                                                    | Donors        | Matched General Population Non-donors | P value <sup>a</sup> |
|----------------------------------------------------|---------------|---------------------------------------|----------------------|
| Pregnancies, number                                | 131           | 792                                   |                      |
| Women, number                                      | 85            | 510                                   |                      |
| Age, years                                         | 32 [29 to 35] | 32 [29 to 36]                         | 0.89                 |
| <u>Year of pregnancy</u>                           |               |                                       | 0.75                 |
| 1994 – 1998                                        | 10 (7.6%)     | 63 (8.0%)                             |                      |
| 1999 – 2003                                        | 24 (18.3%)    | 155 (19.6%)                           |                      |
| 2004 – 2008                                        | 61 (46.6%)    | 327 (41.3%)                           |                      |
| 2009 – 2012                                        | 36 (27.5%)    | 247 (31.2%)                           |                      |
| <u>Prior pregnancies, number</u> <sup>b</sup>      |               |                                       | 0.43                 |
| 0 (none)                                           | 60 (45.8%)    | 360 (45.5%)                           |                      |
| 1                                                  | 51 (38.9%)    | 333 (42.0%)                           |                      |
| ≥ 2                                                | 20 (15.3%)    | 99 (12.5%)                            |                      |
| First pregnancy after cohort entry                 | 85 (64.9%)    | 510 (64.4%)                           | 1.00                 |
| Second pregnancy after cohort entry                | 36 (27.5%)    | 230 (29.0%)                           |                      |
| Third or more pregnancy after cohort entry         | 10 (7.6%)     | 52 (6.6%)                             |                      |
| Time from last prior pregnancy, years <sup>c</sup> | 3 [2 to 4]    | 3 [2 to 5]                            | 0.19                 |
| Time since cohort entry, years <sup>d</sup>        | 4 [2 to 7]    | 4 [2 to 7]                            | 0.67                 |
| Prenatal physician visits, number                  | 10 [7 to 12]  | 10 [9 to 12]                          | 0.06                 |
| Pregnancy ultrasounds, number                      | 3 [2 to 4]    | 3 [2 to 4]                            | 0.08                 |

Data presented as median [interquartile range] or as number (percent).

<sup>a</sup> Derived from generalized linear mixed models with a random intercept with default link function accounting for the correlation structure within matched sets and pregnancies within a woman. A normal distribution was specified when the variable was continuous, a Poisson distribution when the variable was count data, a multinomial distribution when the variable was categorical, and a binomial distribution when the variable was binary.

<sup>b</sup> This includes the pregnancies both before and after the date of cohort entry.

<sup>c</sup> Analysis restricted to those with at least one prior pregnancy; a prior pregnancy could be either before or after the date of cohort entry.

<sup>d</sup> For living kidney donors the date of cohort entry was the date of nephrectomy, and for non-donors it was randomly assigned (simulated nephrectomy date) to establish the date follow-up began.

| <b>Maternal and fetal outcomes in pregnancies of living kidney donors and matched general population non-donors.</b>                                                                              |                             |                                                                  |                        |                      |
|---------------------------------------------------------------------------------------------------------------------------------------------------------------------------------------------------|-----------------------------|------------------------------------------------------------------|------------------------|----------------------|
|                                                                                                                                                                                                   | Number of events (%)        |                                                                  |                        |                      |
|                                                                                                                                                                                                   | Donors<br>(131 pregnancies) | Matched<br>General Population<br>Non-Donors<br>(792 pregnancies) | Odds Ratio<br>(95% CI) | P value <sup>a</sup> |
| <b>Primary outcome</b>                                                                                                                                                                            |                             |                                                                  |                        |                      |
| Gestational hypertension or preeclampsia                                                                                                                                                          | 15 (11.5%)                  | 29 (3.7%)                                                        | 3.2 (1.5 to 6.8)       | <0.01                |
| <b>Secondary outcomes</b>                                                                                                                                                                         |                             |                                                                  |                        |                      |
| Gestational hypertension <sup>b</sup>                                                                                                                                                             | 7 (5.3%)                    | 11 (1.4%)                                                        | 3.9 (1.4 to 10.6)      | 0.01                 |
| Preeclampsia                                                                                                                                                                                      | 8 (6.1%)                    | 18 (2.3%)                                                        | 2.7 (1.1 to 7.0)       | 0.04                 |
| Caesarean section                                                                                                                                                                                 | 41 (31.3%)                  | 234 (29.5%)                                                      | 1.1 (0.7 to 2.0)       | 0.64                 |
| Post-partum hemorrhage                                                                                                                                                                            | ≤ 5 (≤ 3.8%) <sup>c</sup>   | 32 (4.0%)                                                        | 0.7 (0.2 to 2.2)       | 0.58                 |
| Pre-term birth<br>(< 37 weeks gestation)                                                                                                                                                          | 10 (7.6%)                   | 46 (5.8%)                                                        | 1.1 (0.6 to 2.0)       | 0.65                 |
| Low birth weight (< 2500 g)                                                                                                                                                                       | 8 (6.1%)                    | 34 (4.3%)                                                        | 1.7 (0.7 to 3.9)       | 0.20                 |
| Abbreviations: CI, confidence interval.                                                                                                                                                           |                             |                                                                  |                        |                      |
| <sup>a</sup> Derived from random-effects logistic regression models for binary outcome data, accounting for the correlation structure within matched sets and in women with multiple pregnancies. |                             |                                                                  |                        |                      |
| <sup>b</sup> When diagnostic codes for both gestational hypertension and preeclampsia were present in a given pregnancy, we categorized the event as preeclampsia.                                |                             |                                                                  |                        |                      |
| <sup>c</sup> Small cell sizes (count numbers of 1 to 5) were reported as ≤ 5 to comply with privacy regulations.                                                                                  |                             |                                                                  |                        |                      |

### Interpretation of the Results

- The risks of various pregnancy outcomes in donors versus non-donors in the primary analysis and this analysis are highly comparable. In other words, a higher risk of the primary outcome in kidney donors persisted when fewer restrictions were placed on the eligibility of non-donors.
- This may be attributed to the good health of most young women with childbearing potential, and a matching technique that in both analyses ensured balance between the two groups on key baseline biological and non-biological characteristics associated with gestational hypertension and preeclampsia risk (as listed in detail at the beginning of Table S6). The median [interquartile] age in donors and non-donors at cohort entry in both sets of analyses is 29 [interquartile range 26 to 32] years. At this age most women in the general population are quite healthy, even when they have certain diagnostic conditions recorded in healthcare databases.

**Table S7. Table 4 in the manuscript with detailed footnotes.**

| <b>Study characteristics and maternal and fetal outcomes in post-donation pregnancies from Norway, Minnesota (United States) and Ontario (Canada)</b> |                                                                                                                                                                |                                                                                                                                         |                                                                                                                          |
|-------------------------------------------------------------------------------------------------------------------------------------------------------|----------------------------------------------------------------------------------------------------------------------------------------------------------------|-----------------------------------------------------------------------------------------------------------------------------------------|--------------------------------------------------------------------------------------------------------------------------|
|                                                                                                                                                       | <b>Norway<sup>12</sup></b>                                                                                                                                     | <b>Minnesota, United States<sup>13</sup></b>                                                                                            | <b>Ontario, Canada</b>                                                                                                   |
| <u>Study characteristics</u>                                                                                                                          |                                                                                                                                                                |                                                                                                                                         |                                                                                                                          |
| Number of transplant centres                                                                                                                          | one <sup>a</sup>                                                                                                                                               | one                                                                                                                                     | five                                                                                                                     |
| Healthcare system                                                                                                                                     | public universal healthcare                                                                                                                                    | private insurance                                                                                                                       | public universal healthcare                                                                                              |
| Retrospective study                                                                                                                                   | yes                                                                                                                                                            | yes                                                                                                                                     | yes                                                                                                                      |
| Data source                                                                                                                                           | national birth registry                                                                                                                                        | study data                                                                                                                              | provincial healthcare data                                                                                               |
| Outcomes recorded at time of pregnancy                                                                                                                | yes, mandatory reporting to birth registry                                                                                                                     | no, self-reported patient surveys; completed an average of 4 years after post-donation pregnancies and 12 years after first pregnancies | yes, mandatory hospital reporting during pregnancy and fee for service physician claims                                  |
| Eligible pregnancies                                                                                                                                  | > 16 weeks gestation                                                                                                                                           | all pregnancies                                                                                                                         | > 20 weeks gestation                                                                                                     |
| Loss to follow-up after donation                                                                                                                      | < 4% <sup>b</sup>                                                                                                                                              | 24 - 39% <sup>c</sup>                                                                                                                   | < 4%                                                                                                                     |
| Primary groups being compared                                                                                                                         | pregnancies before and after donation                                                                                                                          | pregnancies before and after donation                                                                                                   | follow-up pregnancies in matched donors and non-donors                                                                   |
| Type of non-donor comparison                                                                                                                          | sample from same data source, but not selected for donor similarity and no statistical adjustment for baseline differences between the two groups <sup>d</sup> | general population estimates from published literature; other than race not selected for donor similarity                               | sample from the same data source selected for donor similarity on demographics and other prognostic factors <sup>e</sup> |
| Blood pressure or kidney function values during pregnancy                                                                                             | no                                                                                                                                                             | no                                                                                                                                      | no                                                                                                                       |
| <u>Donor characteristics</u>                                                                                                                          |                                                                                                                                                                |                                                                                                                                         |                                                                                                                          |
| Number of women                                                                                                                                       | 69                                                                                                                                                             | 239                                                                                                                                     | 85                                                                                                                       |
| Years of donation                                                                                                                                     | 1967 to 2002                                                                                                                                                   | 1963 to 2007                                                                                                                            | 1992 to 2009                                                                                                             |
| Family history of kidney failure (%)                                                                                                                  | (...)                                                                                                                                                          | 96% <sup>f</sup>                                                                                                                        | 65% <sup>f</sup>                                                                                                         |
| Mean pre-donation GFR, mL/min per 1.73 m <sup>2</sup>                                                                                                 | (...)                                                                                                                                                          | 91 <sup>g</sup>                                                                                                                         | 114 <sup>g</sup>                                                                                                         |
| White race (%)                                                                                                                                        | 98% <sup>h</sup>                                                                                                                                               | 97%                                                                                                                                     | 70% <sup>h</sup>                                                                                                         |
| Number of post-donation pregnancies                                                                                                                   | 106                                                                                                                                                            | 490                                                                                                                                     | 131                                                                                                                      |
| Mean age at donation, years                                                                                                                           | 27                                                                                                                                                             | 26                                                                                                                                      | 29                                                                                                                       |
| Mean age at pregnancy, years                                                                                                                          | 32                                                                                                                                                             | 29 <sup>i</sup>                                                                                                                         | 32                                                                                                                       |
| Number of women with at least one pre-donation pregnancy (%)                                                                                          | (...)                                                                                                                                                          | 98 (41%)                                                                                                                                | 25 (29%)                                                                                                                 |
| Mean or median time from donation                                                                                                                     | 5                                                                                                                                                              | 5 <sup>i</sup>                                                                                                                          | 4                                                                                                                        |



| to post-donation pregnancies, years        |                       |                        |            |
|--------------------------------------------|-----------------------|------------------------|------------|
| <b>Number of events (% of pregnancies)</b> |                       |                        |            |
| <b>Post-donation maternal outcomes</b>     |                       |                        |            |
| Gestational hypertension or preeclampsia   | 9 (8.5%)              | 55 (11.2%)             | 15 (11.5%) |
| Gestational hypertension                   | 3 (2.8%) <sup>j</sup> | 28 (5.7%) <sup>k</sup> | 7 (5.3%)   |
| Preeclampsia                               | 6 (5.7%)              | 27 (5.5%) <sup>l</sup> | 8 (6.1%)   |
| Maternal death                             | (...)                 | (...)                  | 0 (0.0%)   |
| <b>Post-donation fetal outcomes</b>        |                       |                        |            |
| Pre-term birth (< 37 weeks gestation)      | 10 (9.4%)             | 35 (7.1%)              | 10 (7.6%)  |
| Low birth weight (< 2500 g)                | 9 (8.5%)              | (...)                  | 8 (6.1%)   |
| Stillbirth                                 | 3 (2.8%) <sup>m</sup> | 2 (0.4%) <sup>m</sup>  | 0 (0.0%)   |
| Neonatal death (< 28 days after birth)     | 0 (0.0%)              | (...)                  | 0 (0.0%)   |

Abbreviations: (...) not reported, GFR glomerular filtration rate.

- a. All solid organ transplants in Norway are performed at Rikshospitalet University Hospital. Until 1983 some kidney transplants (<5% of the Norwegian cohort) were also performed at Ullevål University Hospital in Oslo.
- b. Not reported in the manuscript. Given that Norway has a national birth registry and national healthcare, the only loss to follow-up would likely be caused by country emigration.
- c. This is difficult to ascertain from the report. There were 2102 female donors (and incomplete information about the number who still had future child bearing potential) and maternal outcomes were assessed in the second of two patient surveys. Between 1280 to 1589 of the 2102 female donors responded to the surveys. 180 female donors did not respond to any survey, and 333 female donors were not contacted due to lack of contact information or if it was known that they had died.
- d. A random sample of 21 511 pregnancies was obtained from the registry, not selected for baseline similarity to the donors (e.g. pregnancies after donation are more likely to occur in older women where a reasonable proportion have a prior delivery history; maternal age in post-donation pregnancies was on average 5 years more than the registry pregnancies). Statistical tests that compared donors and non-donor outcomes (Fisher Exact test) did not adjust for age or other important baseline differences between the two groups.
- e. Non-donors and donors were matched on characteristics associated with gestational hypertension and preeclampsia risk: age (older age is associated with greater risk), cohort entry date (to account for any secular trends), history of at least one previous delivery and number of previous deliveries (previous uneventful pregnancies reduce the risk), urban versus rural place of residence (rural residence increases risk), socioeconomic status based on neighborhood income quintile (lower socioeconomic status increases the risk) and time to first birth after cohort entry (a greater interval from a previous pregnancy increases the risk). Non-donors were also selected to have good baseline health.
- f. In the Minnesota study this was defined as ‘related to the recipient’; in the Ontario study this was defined as ‘a first degree relative of the recipient’.
- g. In the Minnesota study this was estimated with the Modification of Diet in Renal Disease (MDRD) study equation; in the Ontario study this was estimated with the Chronic Kidney Disease Epidemiology Collaboration (CKD-Epi) study equation.
- h. Best estimates using Organ Procurement Organization records, Census data and other sources. The Ontario study database contains race information for 46% of donors in the study sample.
- i. Defined at the time of first pregnancy after donation; this information was not reported for all post-donation pregnancies included in the analyses, only for women who had post-donation pregnancies without pre-donation pregnancies.
- j. Information in the Medical Birth Record of Norway, where submitted forms were completed by the attending obstetrician or midwife. During the observational period in Norway, gestational hypertension was defined as a blood pressure  $\geq$  140/90 mmHg or increase in diastolic blood pressure of at least 15 mmHg or systolic blood pressure of at least 30 mmHg from the woman’s average blood pressure before 20 weeks gestation, without proteinuria. Preeclampsia was defined as gestational hypertension with proteinuria. Proteinuria was defined as an excretion of  $\geq$  0.3 g per day, usually equivalent to  $\geq$  1+ on a standard urine test strip.
- k. Defined as participant reporting of the need for hypertension treatment during pregnancy, but not before or after.

- l. Typically defined as hypertension associated with new-onset proteinuria or edema, recorded by the woman's recall of the diagnosis by the primary care provider.
- m. In the Norway study, a fetus was recorded as stillborn if it died before or during labor; in the Minnesota study, we defined stillbirths from reports of fetal death.
